# Supplementary material for: How Do Phenolic Acids Change the Secondary and Tertiary Structure of Gliadin? Studies with an Application of Spectroscopic Techniques
Source: MDPI journal article supplement (doi:10.3390/ijms23116053), 2022-05-27
Supplement: s1 [file s1]

## Supplementary Material

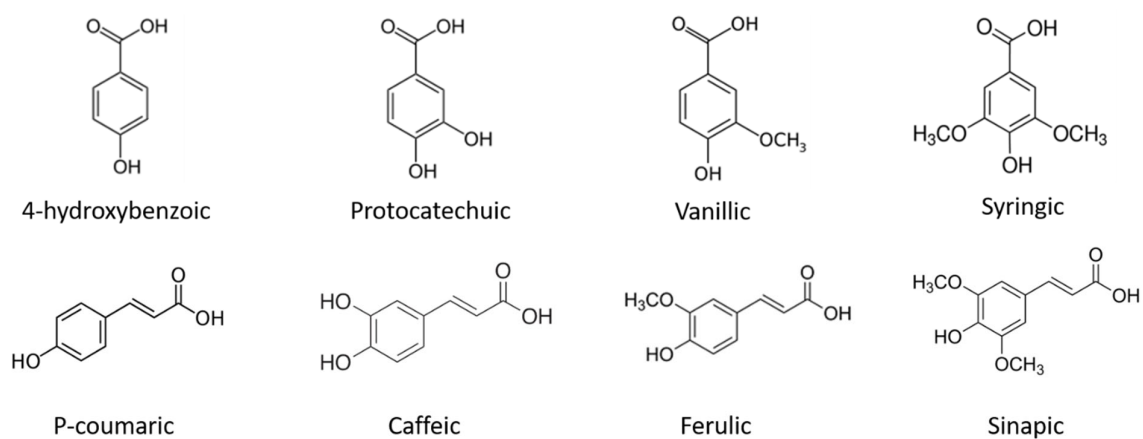

**Figure S1.** Chemical structure of analyzed phenolic acids.

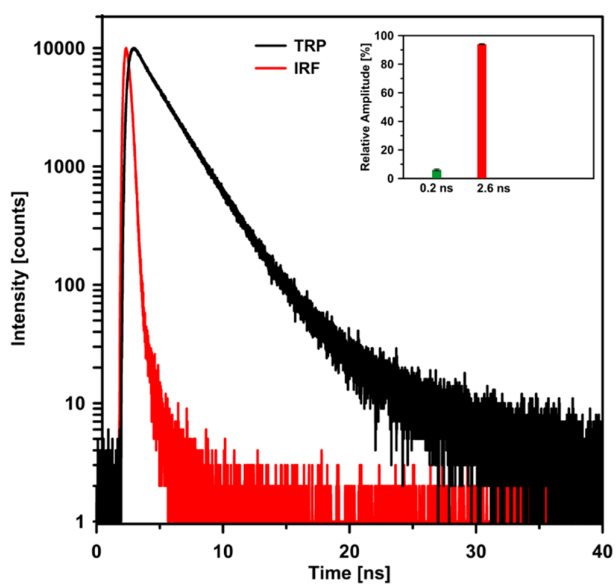

**Figure S2.** Fluorescence decay kinetics of tryptophan emission in ethanol-water (70:30 v/v) solution. The fluorescence decay kinetics were fitted with components characterized by the lifetimes: 0.2 ns and 2.6 ns. The inner panel presents relative amplitudes of the fluorescence lifetime components.
